# Supplementary material
Source: MDPI journal article supplement (https://www.mdpi.com/2073-4344/13/6/927)
Supplement: s1 [file s1]

**Supporting Information For**  
**Phosphate removal by one-step hydrothermal prepared Ca-modified**  
**magnetic sludge biochar**

Xu Liu <sup>a</sup>, Yushan Li <sup>a, \*</sup>, Hao Zhou <sup>c, \*</sup>, Jing Guo <sup>b</sup>, Yonghou Xiao <sup>a</sup>, Cong Liu <sup>d</sup>, Boxing An <sup>a</sup>,  
Zhengqi Liang <sup>a</sup>

a Panjin Institute of Industrial Technology, Liaoning Key Laboratory of Chemical Additive Synthesis and Separation, Dalian University of Technology, Panjin 124221, China

b School of Chemical Engineering Dalian University of Technology, Panjin campus, Panjin 124221, China

c School of Ocean Science and Technology, Dalian University of Technology, Panjin 124221, China

d Shandong HELP Safety and Environmental protection Technique Pty Ltd Panjin Branch

**This PDF includes:**

**Supplementary Table S1-S4**

**Supplementary Figure S1**

## Supplementary Information Table

**Table S1 ICP-MS and elemental quantitative analysis results**

| No. | Elements | Content                  |                           |
|-----|----------|--------------------------|---------------------------|
|     |          | SS                       | Ca-MSBC                   |
| 1   | C        | 56.93%                   | 49.76%                    |
| 2   | O        | 37.24%                   | 37.24%                    |
| 3   | Fe       | 50.98 mg g <sup>-1</sup> | 225.15 mg g <sup>-1</sup> |
| 4   | Ca       | 13.35 mg g <sup>-1</sup> | 17.29 mg g <sup>-1</sup>  |
| 5   | P        | 30.73 mg g <sup>-1</sup> | 38.08 mg g <sup>-1</sup>  |

**Table S2 Specific surface area and pore volume pore size table**

| Sample Name                    | Total specific<br>surface area<br>(m <sup>2</sup> g <sup>-1</sup> ) | Total accumulated pore<br>volume for desorption<br>(cm <sup>3</sup> g <sup>-1</sup> ) | Desorption average pore<br>size<br>(nm) |
|--------------------------------|---------------------------------------------------------------------|---------------------------------------------------------------------------------------|-----------------------------------------|
| Ca-MSBC<br>(Before adsorption) | 349.73                                                              | 0.12                                                                                  | 36.73                                   |
| Ca-MSBC<br>(After adsorption)  | 224.62                                                              | 0.10                                                                                  | 21.79                                   |

**Table S3 Comparison of similar feedstock adsorption capacities**

| No. | Treatment method                                                            | Target sorbate | Adsorption capacity               | References    |
|-----|-----------------------------------------------------------------------------|----------------|-----------------------------------|---------------|
| 1   | Biochar activated using MgO                                                 | phosphate      | 8.42 mg P g <sup>-1</sup> pH=10.0 | [1]           |
| 2   | Feedstock impregnated with MgCl <sub>2</sub>                                |                | 8.1 mg P g <sup>-1</sup> pH=9.0   | [2]           |
| 3   | Hydrothermal carbonization in MgCl <sub>2</sub> -AlCl <sub>3</sub> solution |                | 51 mg P g <sup>-1</sup> pH=10.0   | [3]           |
| 4   | Sludge iron based adsorbent                                                 |                | 15 mg P g <sup>-1</sup> pH=10.0   | [4]           |
| 5   | Ca-MSBC                                                                     |                | 89.25 P g <sup>-1</sup> pH=10.0   | Present study |

**Table S4 Thermodynamic parameters of phosphate adsorption on Ca-MSBC**

| T (K) | $\Delta G^{\theta}$ (kJ mol <sup>-1</sup> ) | $\Delta S^{\theta}$ (J mol <sup>-1</sup> ·K <sup>-1</sup> ) | $\Delta H^{\theta}$ (J mol <sup>-1</sup> ) |
|-------|---------------------------------------------|-------------------------------------------------------------|--------------------------------------------|
| 303   | -16.11                                      | 166.5                                                       | 48.5                                       |
| 313   | -17.68                                      |                                                             |                                            |
| 323   | -23.42                                      |                                                             |                                            |
| 333   | -39.80                                      |                                                             |                                            |
| 343   | -43.46                                      |                                                             |                                            |
| 353   | -23.84                                      |                                                             |                                            |

### Supplementary Information Figure

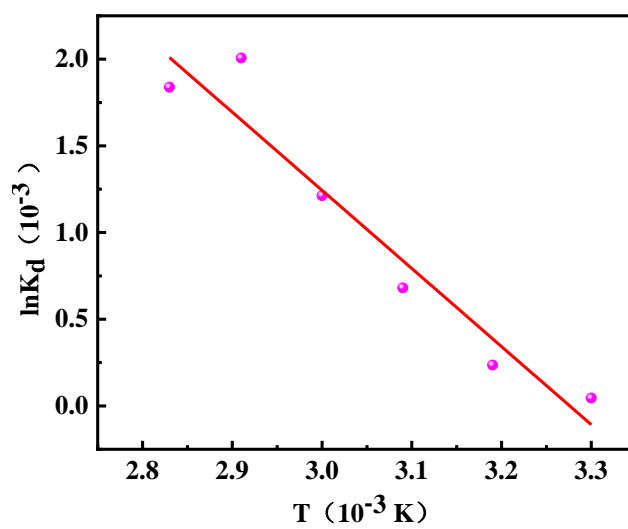

Figure S1. Linear plot of  $\ln K_d$  vs  $1/T$

## References

- [1] Park JH, Ok YS, Kim SH, Cho JS, Heo JS, Delaune RD, Seo DC (2015) Evaluation of phosphorus adsorption capacity of sesame straw biochar on aqueous solution: influence of activation methods and pyrolysis temperatures. *Environ Geochem Health* 37:969–983.
- [2] Fang C, Zhang T, Li P, Jiang RF, Wang YC (2014) Application of magnesium modified corn biochar for phosphorus removal and recovery from swine wastewater. *Int J Environ Res Public Health* 11:9217–9237.
- [3] Zhang M, Gao B, Fang J, Creamer AE, Ullman JL (2014) Self-assembly of needle-like layered double hydroxide (LDH) nanocrystals on hydrochar: characterization and phosphate removal ability. *RSC Adv* 4:28171–28175.
- [4] Musfique Ahmed, Mina Aziziha, Rifat Anwar, Matthew B. Johnson, Lian-Shin Lin (2021) Magnetic sludge byproducts for adsorptive phosphorus removal: Resource recovery from iron-based anaerobic sewage sludge. *Waste Management* 120 :269–276.
